# Supplementary material for: Phytochemical Analysis of Anvillea garcinii Leaves: Identification of Garcinamines F–H and Their Antiproliferative Activities
Source: MDPI journal article supplement (doi:10.3390/plants10061130), 2021-06-02
Supplement: s1 [file s1]

# SUPPLEMENTARY MATERIAL

## Phytochemical Analysis of *Anvillea garcinii* Leaves: Identification of Garcinamines F–H and Their Antiproliferative Activities

Hanan Y. Aati<sup>1</sup>, Shagufta Perveen<sup>1\*</sup>, Raha Orfali<sup>1</sup>, Areej M. Al-Taweel<sup>1</sup>, Jiangnan Peng<sup>2</sup>, Sobia Tabassum<sup>3</sup>, Maged S. Abdel-Kader<sup>4</sup>, Hasan Soliman Yusufoglu<sup>4</sup> and Orazio Tagliatalata-Scafati<sup>5</sup>

<sup>1</sup>Department of Pharmacognosy, College of Pharmacy, King Saud University. P. O. Box 22452, Riyadh 11495, Kingdom of Saudi Arabia;

<sup>2</sup>Department of Chemistry, School of Computer, Mathematical and Natural Sciences, Morgan State University, Baltimore, M D, 21251, USA;

<sup>3</sup>Interdisciplinary Research Centre in Biomedical Materials (IRCBM), COMSATS University Islamabad, Lahore Campus, Pakistan;

<sup>4</sup>Department of Pharmacognosy, College of Pharmacy, Prince Sattam Bin Abdulaziz University, P.O. Box 173, Al-Kharj 11942, Saudi Arabia;

<sup>5</sup>Department of Pharmacy, School of Medicine and Surgery, University of Naples Federico II, Via Montesano 49, 80131 Naples, Italy;

**Figure S1.** <sup>13</sup>C NMR Spectra of Compound **1** in CD<sub>3</sub>OD.

**Figure S2.** DEPT-135 NMR Spectra of Compound **1** in CD<sub>3</sub>OD.

**Figure S3.** <sup>1</sup>H NMR Spectra of Compound **1** in CD<sub>3</sub>OD.

**Figure S4.** HSQC Spectra of Compound **1** in CD<sub>3</sub>OD.

**Figure S5.** HMBC Spectra of Compound **1** in CD<sub>3</sub>OD.

**Figure S6.** COSY of Compound **1** in CD<sub>3</sub>OD.

**Figure S7.** <sup>13</sup>C NMR Spectra of Compound **2** in CD<sub>3</sub>OD.

**Figure S8.** DEPT-135 NMR Spectra of Compound **2** in CD<sub>3</sub>OD.

**Figure S9.** <sup>1</sup>H NMR Spectra of Compound **2** in CD<sub>3</sub>OD.

**Figure S10.** HSQC Spectra of Compound **2** in CD<sub>3</sub>OD.

**Figure S11.** HMBC Spectra of Compound **2** in CD<sub>3</sub>OD.

**Figure S12.** COSY of Compound **2** in CD<sub>3</sub>OD.

**Figure S13.** <sup>13</sup>C NMR Spectra of Compound **3** in CD<sub>3</sub>OD.

**Figure S14.** DEPT-135 NMR Spectra of Compound **3** in CD<sub>3</sub>OD.

**Figure S15.** <sup>1</sup>H NMR Spectra of Compound **3** in CD<sub>3</sub>OD.

**Figure S16.** HSQC Spectra of Compound **3** in CD<sub>3</sub>OD.

**Figure S17.** HMBC Spectra of Compound **3** in CD<sub>3</sub>OD.

**Figure S18.** COSY of Compound **3** in CD<sub>3</sub>OD.

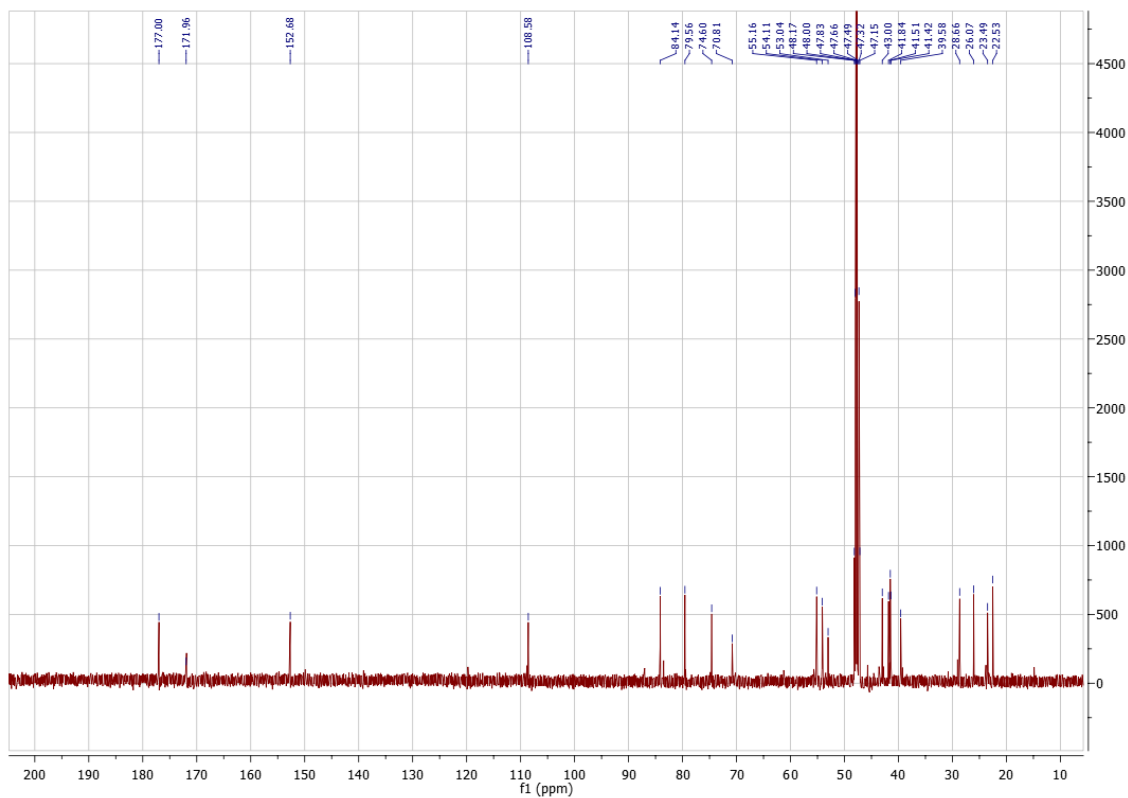

**Figure S1.**  $^{13}\text{C}$  NMR Spectrum of Compound **1** in  $\text{CD}_3\text{OD}$ .

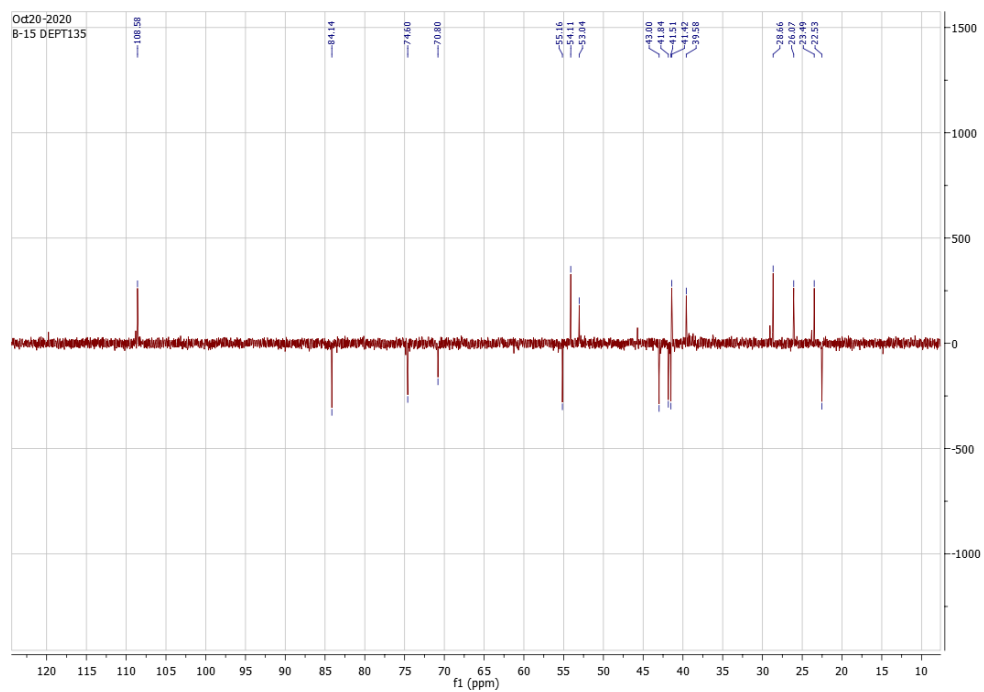

**Figure S2.** DEPT-135 NMR spectrum of compound **1** in  $\text{CD}_3\text{OD}$ .

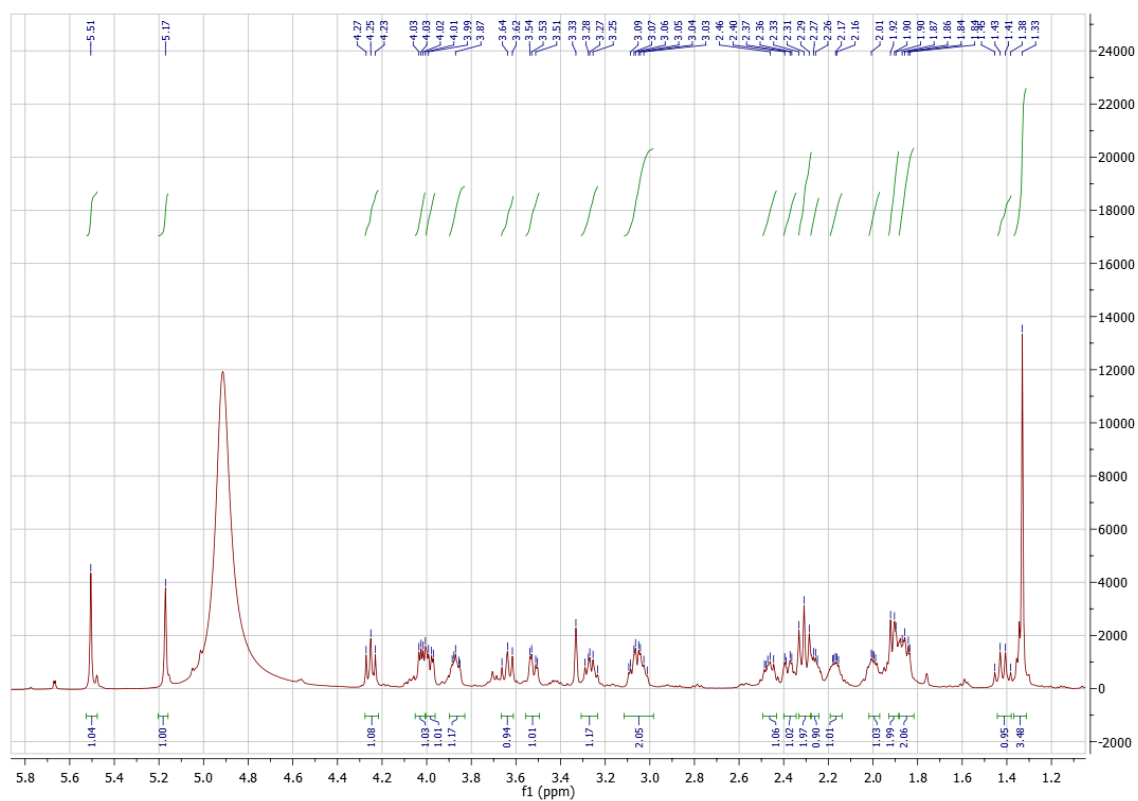

**Figure S3.**  $^1\text{H}$  NMR spectrum of compound **1** in  $\text{CD}_3\text{OD}$ .

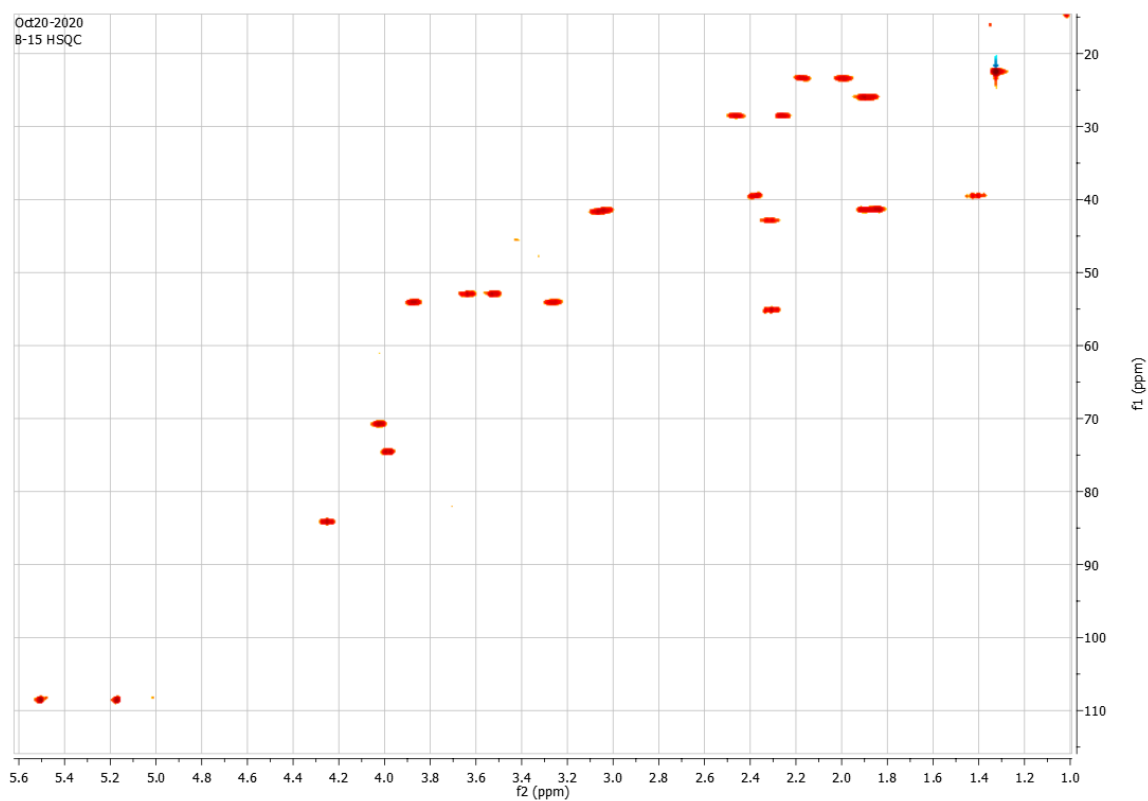

**Figure S4.** HSQC spectrum of Compound **1** in CD<sub>3</sub>OD.

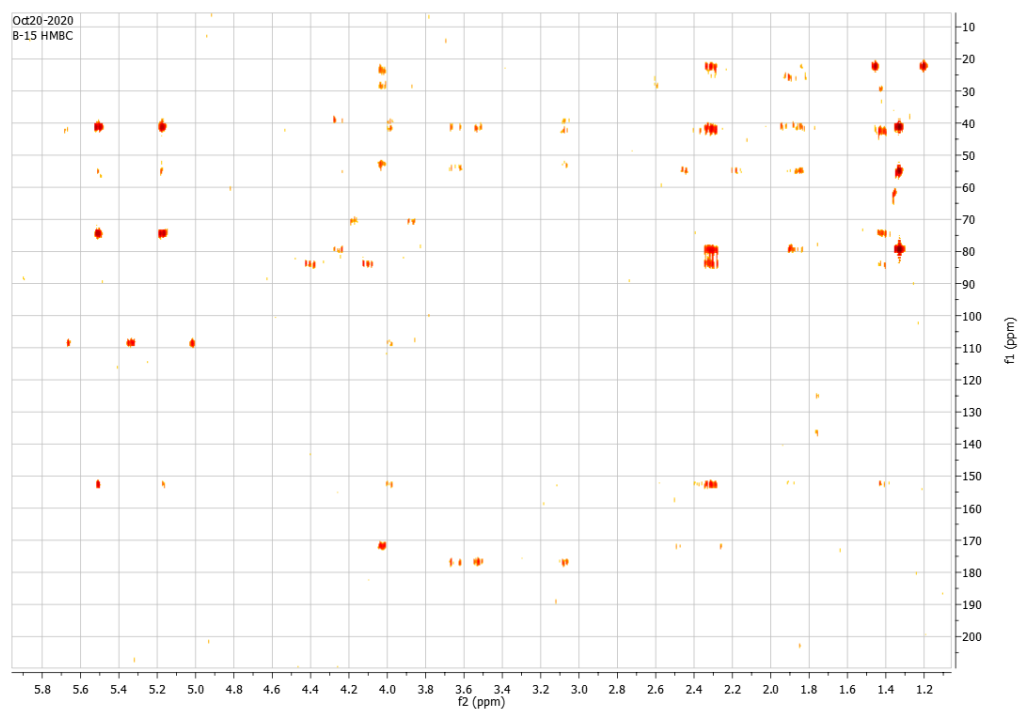

**Figure S5.** HMBC spectrum of compound **1** in CD<sub>3</sub>OD.

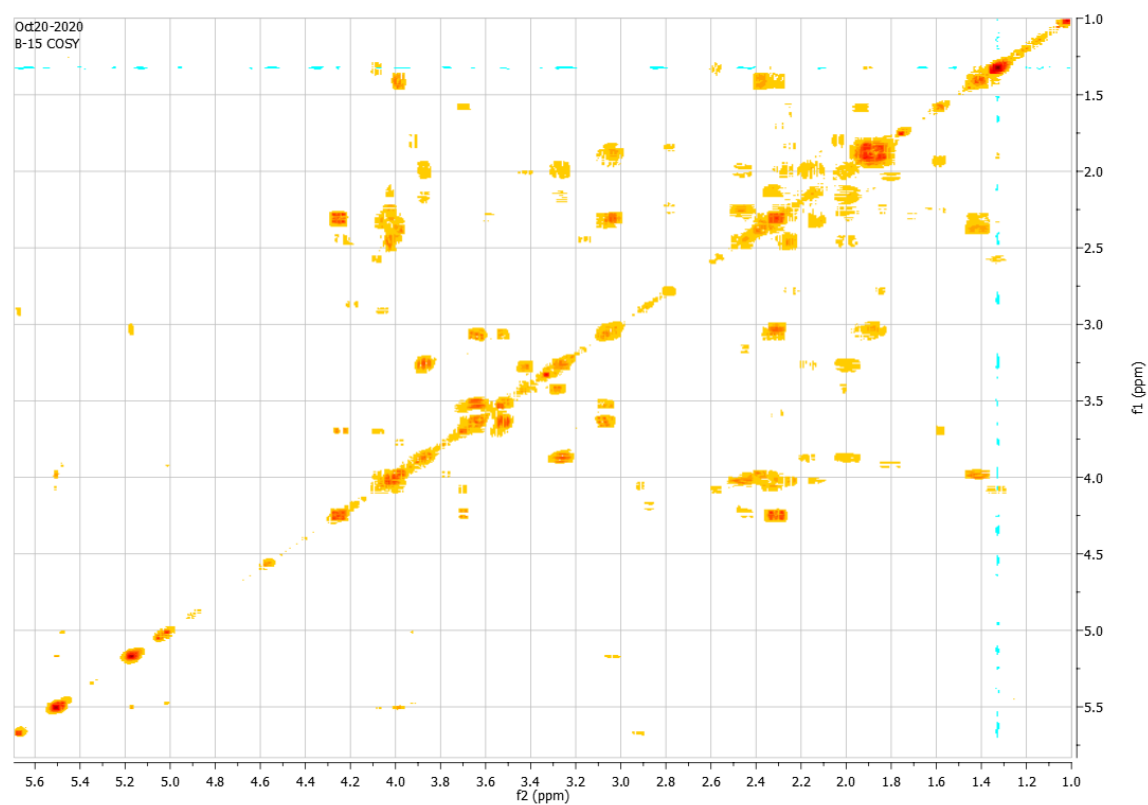

**Figure S6.** COSY spectrum of compound **1** in CD<sub>3</sub>OD.

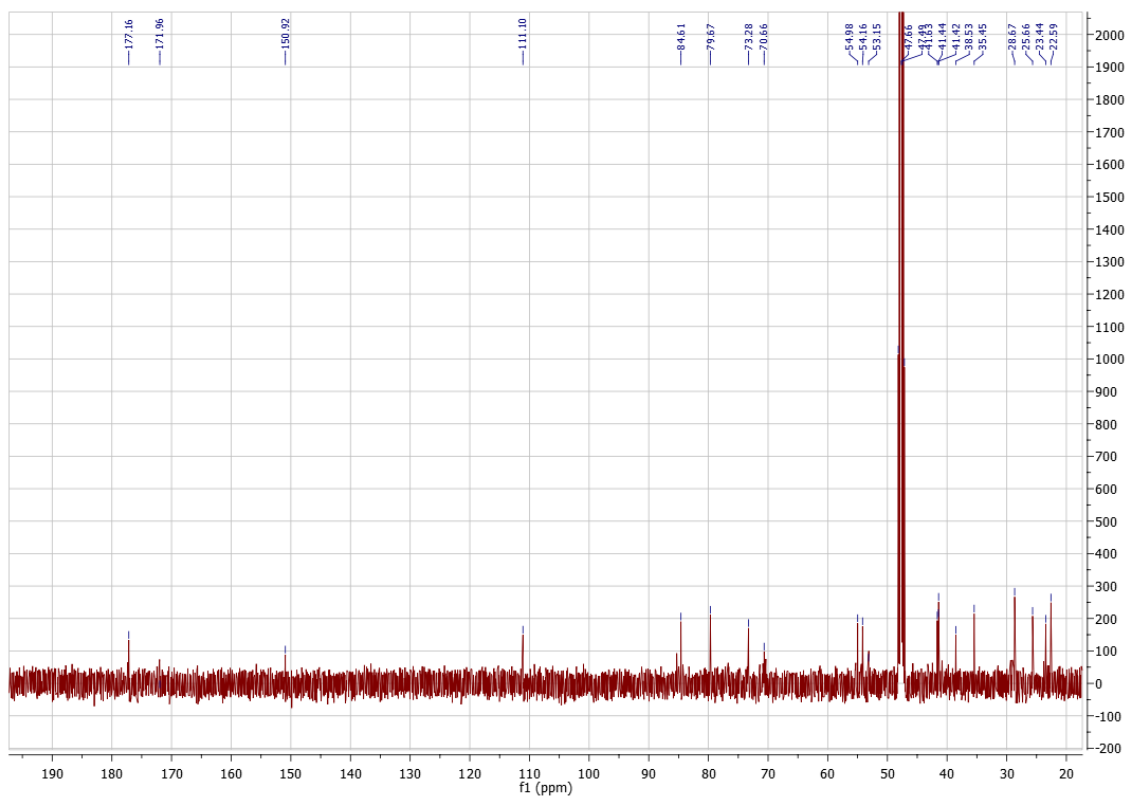

**Figure S7.**  $^{13}\text{C}$  NMR spectrum of compound **2** in  $\text{CD}_3\text{OD}$ .

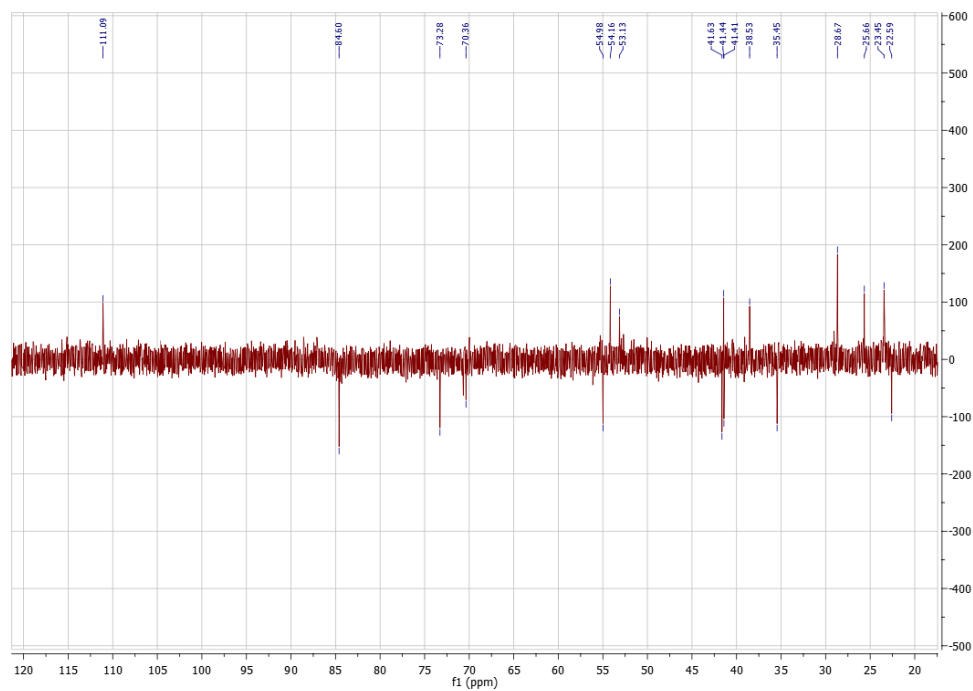

**Figure S8.** DEPT-135 NMR spectrum of compound **2** in  $\text{CD}_3\text{OD}$ .

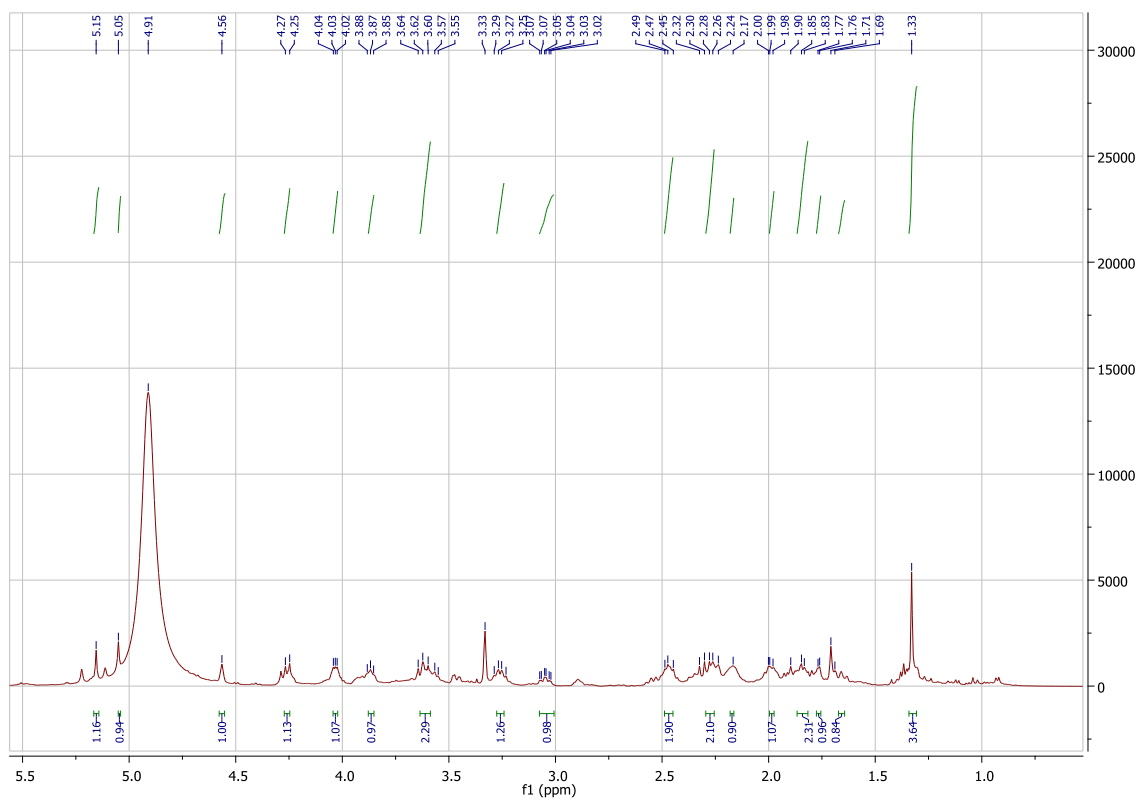

**Figure S9.** <sup>1</sup>H NMR spectrum of compound **2** in CD<sub>3</sub>OD.

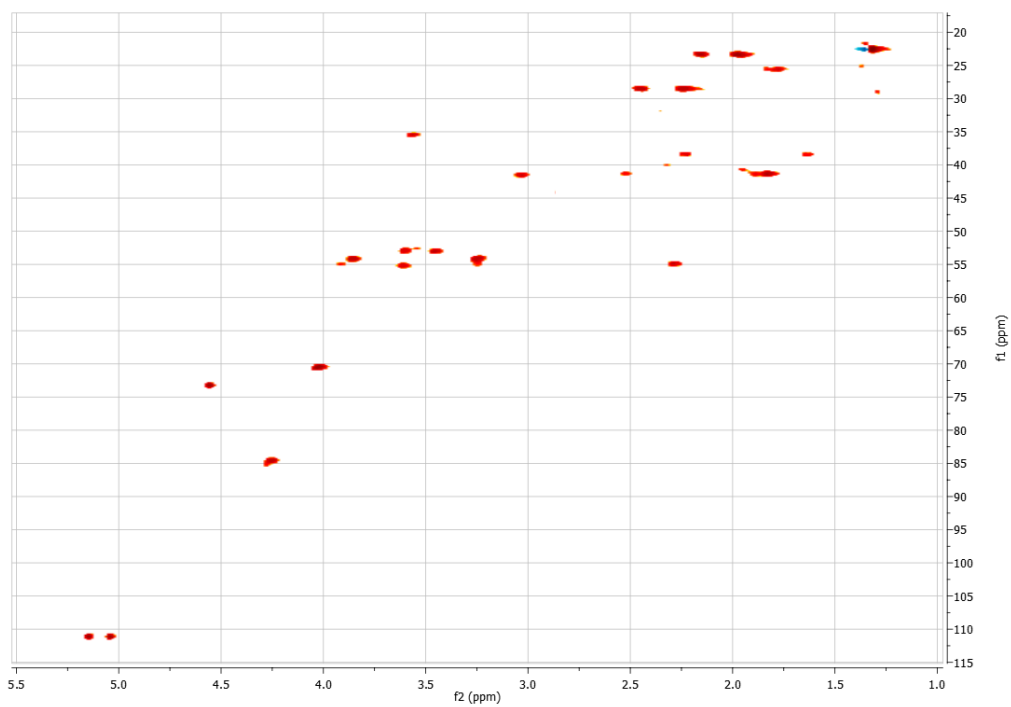

**Figure S10.** HSQC spectrum of compound **2** in CD<sub>3</sub>OD.

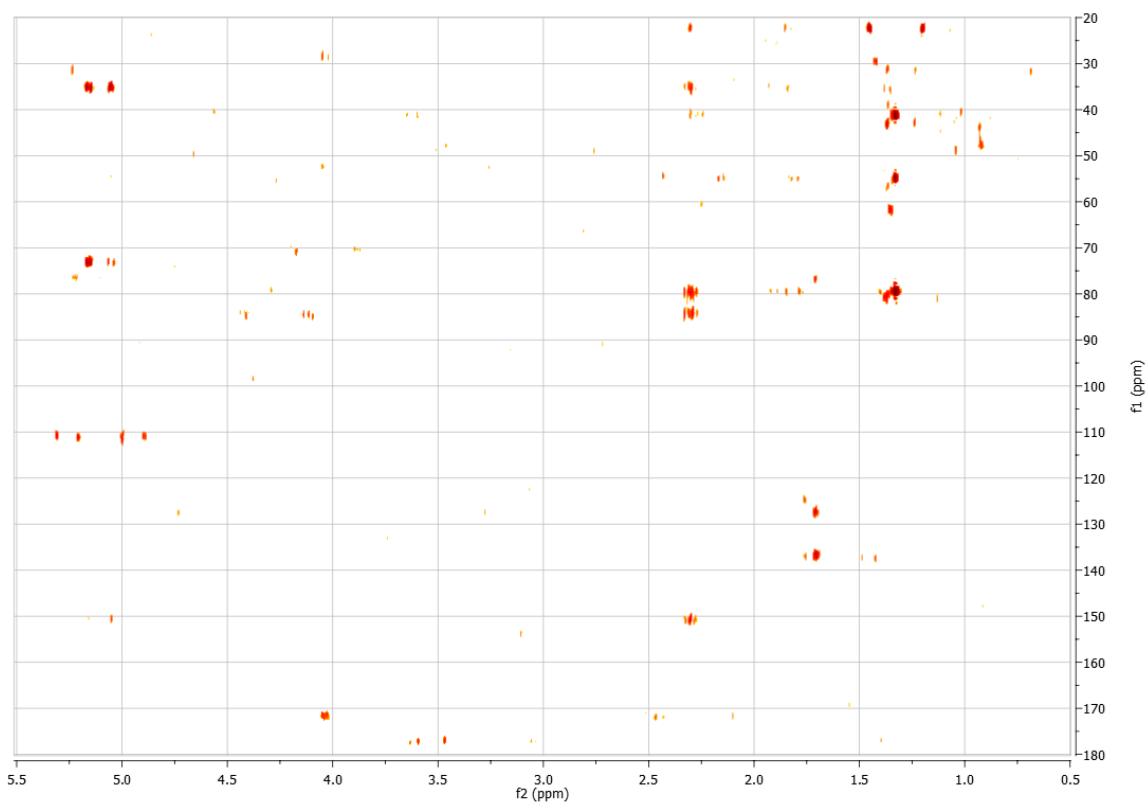

**Figure S11.** HMBC spectrum of compound **2** in  $\text{CD}_3\text{OD}$ .

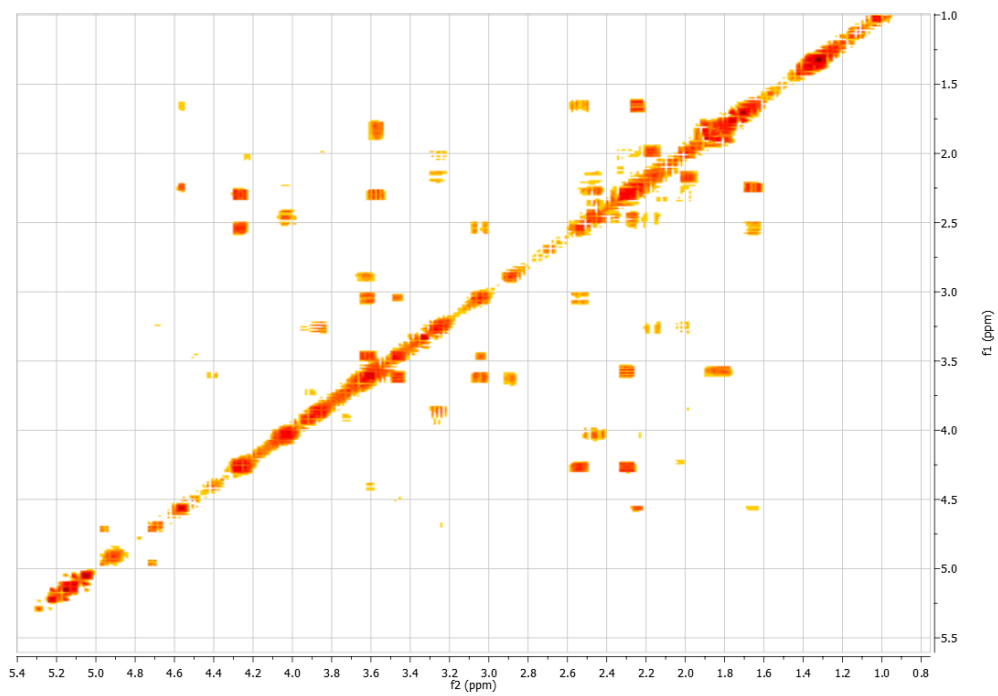

**Figure S12.** COSY spectrum of compound **2** in  $\text{CD}_3\text{OD}$ .



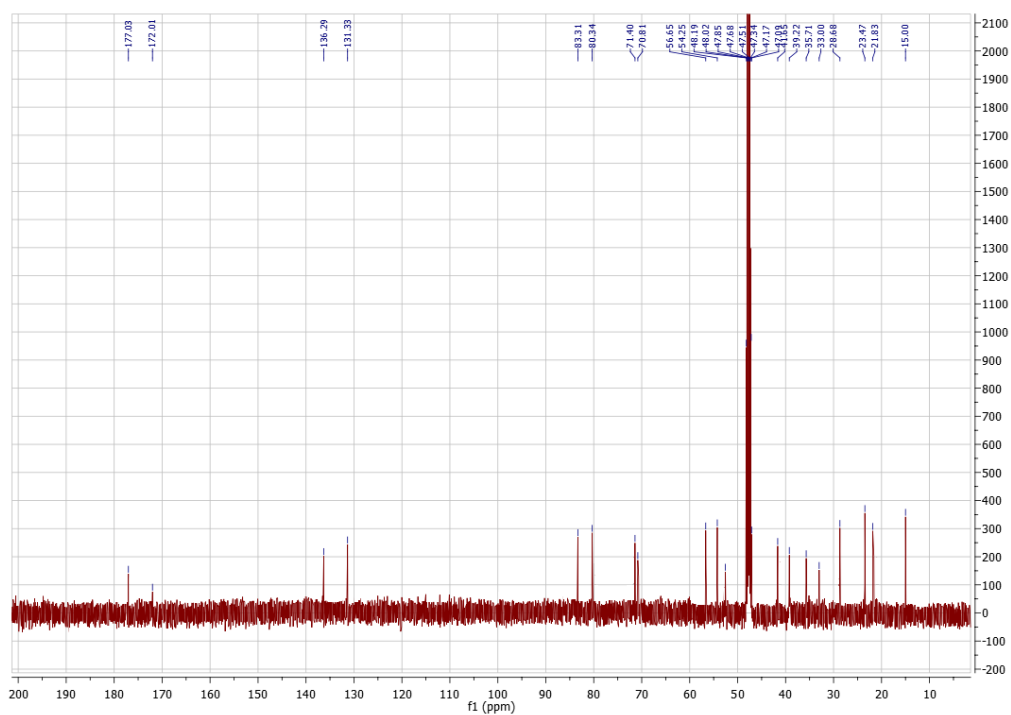

**Figure S13.**  $^{13}\text{C}$  NMR spectrum of compound **3** in  $\text{CD}_3\text{OD}$ .

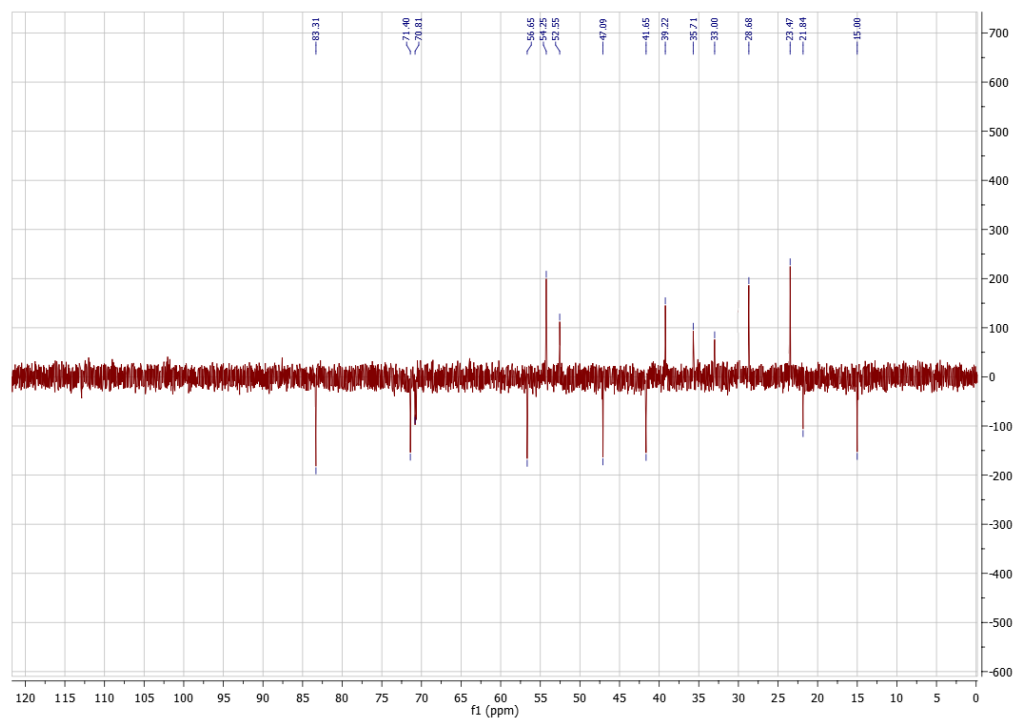

**Figure S14.** DEPT-135 NMR spectrum of compound **3** in  $\text{CD}_3\text{OD}$ .

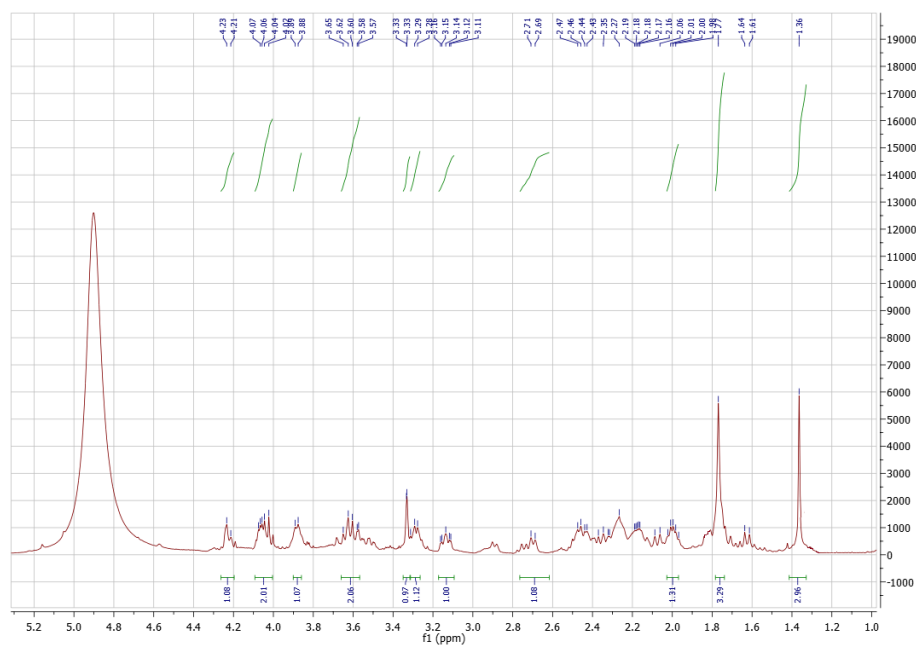

**Figure S15.**  $^1\text{H}$  NMR spectrum of compound **3** in  $\text{CD}_3\text{OD}$ .

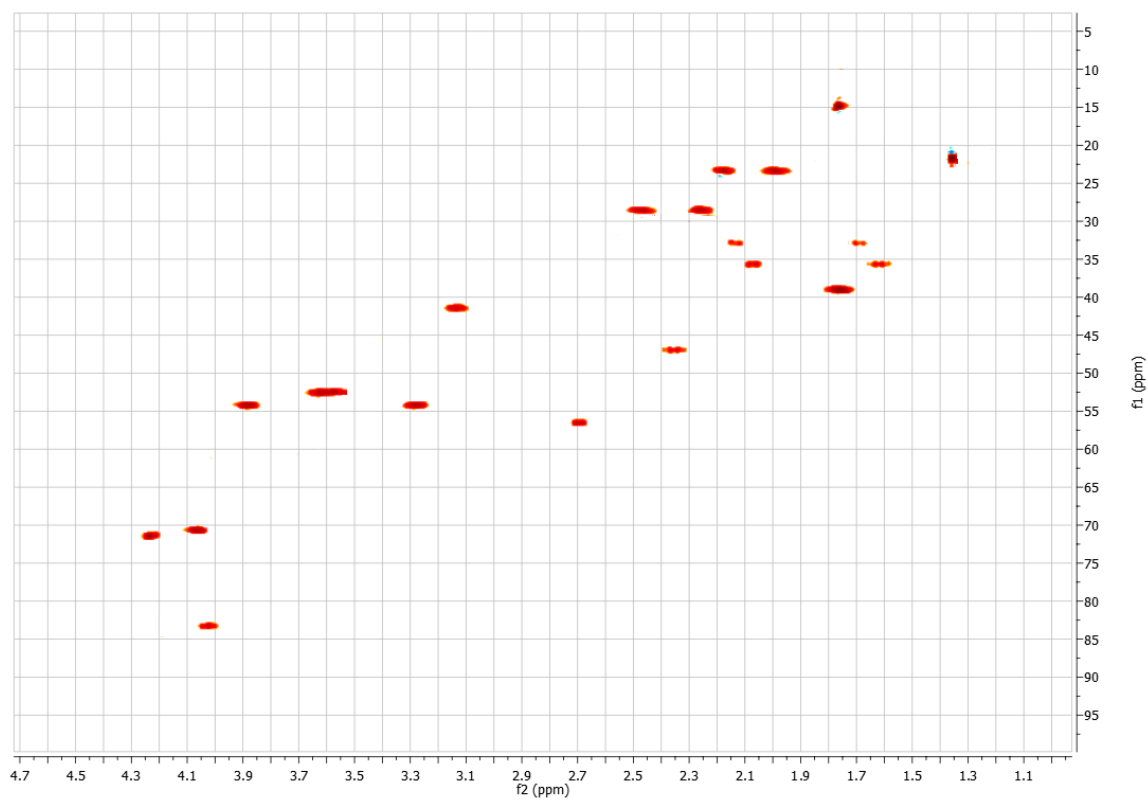

**Figure S16.** HSQC spectrum of compound **3** in  $\text{CD}_3\text{OD}$ .

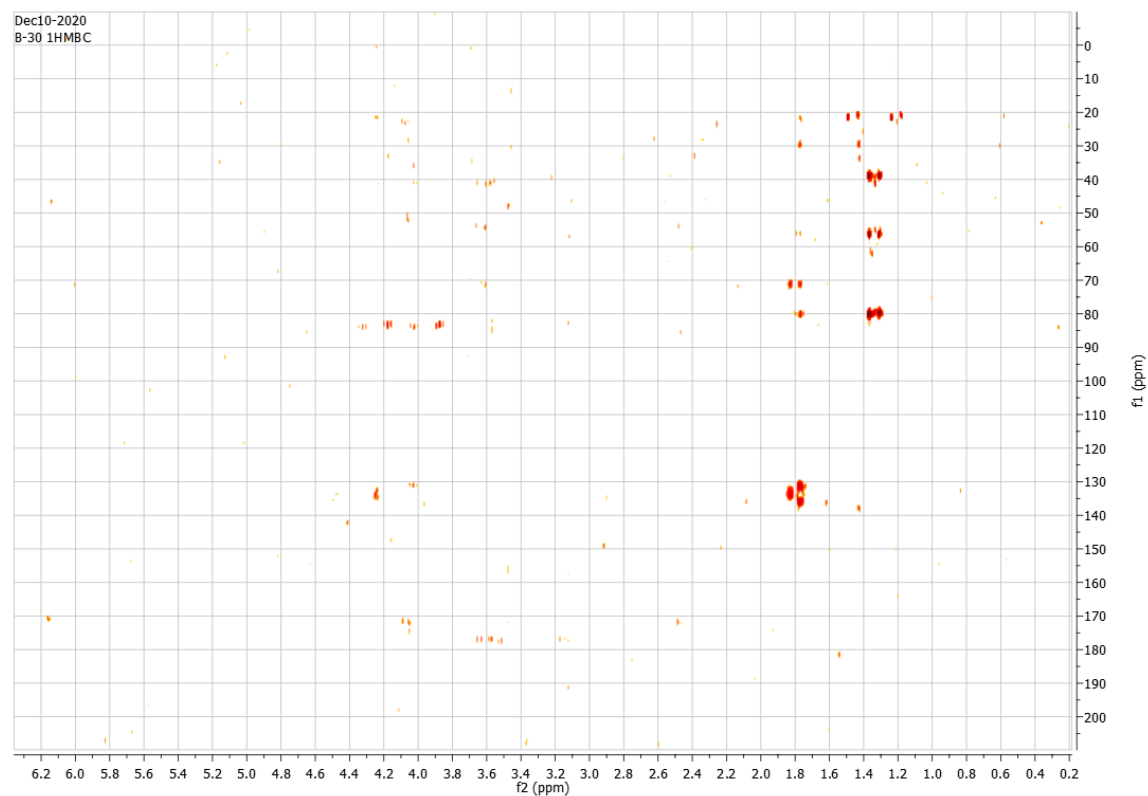

**Figure S17.** HMBC spectrum of compound **3** in CD<sub>3</sub>OD.

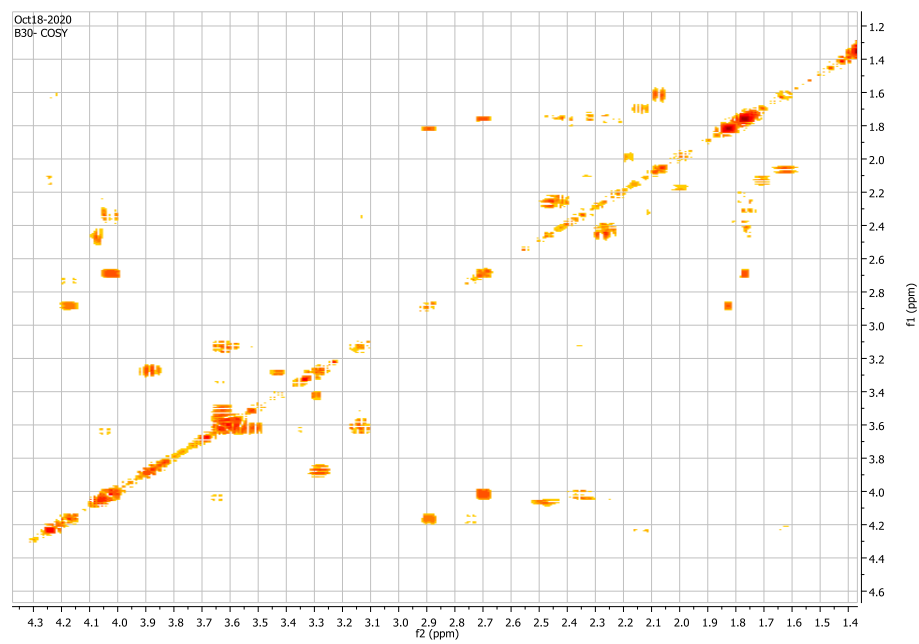

**Figure S18.** COSY spectrum of compound **3** in CD<sub>3</sub>OD.
